# Supplementary material for: Deep sequencing of the viral phoH gene reveals temporal variation, depth-specific composition, and persistent dominance of the same viral phoH genes in the Sargasso Sea
Source: PeerJ. 2015 Jun 16;3:e997. doi: 10.7717/peerj.997 (PMC4476143; doi:10.7717/peerj.997)
Supplement: Table S2 [file peerj-03-997-s007.xlsx]

## Sheet: Sheet1
Supplemental Table S2: Barcodes used to tag phoH amplicons
Barcode Name	Barcode Sequence
MID 01	ACGAGTGCGT
MID 02	ACGCTCGACA
MID 03	AGACGCACTC
MID 04	AGCACTGTAG
MID 05	ATCAGACACG
MID 06	ATATCGCGAG
MID 07	CGTGTCTCTA
MID 08	CTCGCGTGTC
MID 13	CATAGTAGTG
MID 14	CGAGAGATAC
MID 15	ATACGACGTA
MID 16	TCACGTACTA
MID 17	CGTCTAGTAC
MID 18	TCTACGTAGC
MID 19	TGTACTACTC
MID 20	ACGACTACAG
MID 21	CGTAGACTAG
MID 22	TACGAGTATG
MID 23	TACTCTCGTG
MID 24	TAGAGACGAG
MID 25	TCGTCGCTCG
MID 26	ACATACGCGT
MID 27	ACGCGAGTAT
